# Supplementary material for: Circulating microRNAs as biomarkers in bile-derived exosomes of cholangiocarcinoma
Source: PubMed Central journal article supplement — Ann Surg Treat Res. 2021 Aug 31;101(3):140–50. doi: 10.4174/astr.2021.101.3.140 (PMC8424434; doi:10.4174/astr.2021.101.3.140), 2021-08-31
Supplement: astr-101-140-s001.pdf [file astr-101-140-s001.pdf]

**Supplementary Table 1.** Predicted mRNA targets of differentially expressed miRNAs

| miRNA-target miRTarBase |                        |                      |             |           |             |         |            |          |          |            |            |            |            |           |             |            |
|-------------------------|------------------------|----------------------|-------------|-----------|-------------|---------|------------|----------|----------|------------|------------|------------|------------|-----------|-------------|------------|
| miR-29a-3p              | miR-29b-3p             | miR-29c-3p           | miR-200b-3p | miR-21-5p | miR-181a-5p | miR-429 | miR-192-5p | miR-7-5p | miR-451a | miR-215-5p | miR-10a-5p | miR-191-5p | miR-15a-3p | let-7a-3p | miR-1285-3p | miR-23a-5p |
| DNMT1 <sup>a)</sup>     | TDG                    | PDGFRB <sup>a)</sup> |             |           |             |         |            |          |          |            |            |            |            |           |             |            |
| COL5A2 <sup>a)</sup>    | SERPINH1 <sup>a)</sup> | CD274                |             |           |             |         |            |          |          |            |            |            |            |           |             |            |
| COL10A1 <sup>a)</sup>   | AKT2                   | TIAM1                |             |           |             |         |            |          |          |            |            |            |            |           |             |            |
| FBN1 <sup>a)</sup>      | TET2 <sup>a)</sup>     | ITGB1 <sup>a)</sup>  |             |           |             |         |            |          |          |            |            |            |            |           |             |            |
| SERPINH1 <sup>a)</sup>  | LAMC2 <sup>a)</sup>    | CREB5 <sup>a)</sup>  |             |           |             |         |            |          |          |            |            |            |            |           |             |            |
| LOX                     | ITGA6 <sup>a)</sup>    | SP1                  |             |           |             |         |            |          |          |            |            |            |            |           |             |            |
| PDGFRB <sup>a)</sup>    | COL5A2 <sup>a)</sup>   | ADAM12               |             |           |             |         |            |          |          |            |            |            |            |           |             |            |
| CDC7                    | COL10A1 <sup>a)</sup>  | KLF4                 |             |           |             |         |            |          |          |            |            |            |            |           |             |            |
| CD93                    | SPARC <sup>a)</sup>    | NASP                 |             |           |             |         |            |          |          |            |            |            |            |           |             |            |
| SRGAP2                  | FBN1 <sup>a)</sup>     | LRP6 <sup>a)</sup>   |             |           |             |         |            |          |          |            |            |            |            |           |             |            |
| RNASEL                  | LOX                    | FZD4 <sup>a)</sup>   |             |           |             |         |            |          |          |            |            |            |            |           |             |            |
| MUC1                    | PDGFRB <sup>a)</sup>   | FZD5 <sup>a)</sup>   |             |           |             |         |            |          |          |            |            |            |            |           |             |            |
| AKT3 <sup>a)</sup>      | PDGFC <sup>a)</sup>    | CNOT6 <sup>a)</sup>  |             |           |             |         |            |          |          |            |            |            |            |           |             |            |
| ITGB1 <sup>a)</sup>     | MMP9 <sup>a)</sup>     |                      |             |           |             |         |            |          |          |            |            |            |            |           |             |            |
| KEAP1                   | ITGB1 <sup>a)</sup>    |                      |             |           |             |         |            |          |          |            |            |            |            |           |             |            |
| ALDH5A1                 | HMGCR                  |                      |             |           |             |         |            |          |          |            |            |            |            |           |             |            |
| GSK3B <sup>a)</sup>     | LRP6 <sup>a)</sup>     |                      |             |           |             |         |            |          |          |            |            |            |            |           |             |            |
| ADAM12                  | AKT3 <sup>a)</sup>     |                      |             |           |             |         |            |          |          |            |            |            |            |           |             |            |
| HMGCR                   | MYC <sup>a)</sup>      |                      |             |           |             |         |            |          |          |            |            |            |            |           |             |            |
| MYC <sup>a)</sup>       |                        |                      |             |           |             |         |            |          |          |            |            |            |            |           |             |            |
| NMI <sup>a)</sup>       |                        |                      |             |           |             |         |            |          |          |            |            |            |            |           |             |            |

mRNA, messenger RNA; miRNA, microRNA.

<sup>a)</sup>These genes were actually differentially expressed between normal and cancer bile samples.
